# Supplementary material for: Indole-3-acetamide from gut microbiota activated hepatic AhR and mediated the remission effect of Lactiplantibacillus plantarum P101 on alcoholic liver injury in mice
Source: Royal Society of Chemistry journal article supplement (doi:10.1039/d3fo03585a), 2023-01-01
Supplement: d3fo03585a1.pdf [file d3fo03585a1.pdf]

**Indole-3-acetamide from gut microbiota activated hepatic AhR and mediated the remission effect of *Lactiplantibacillus plantarum* P101 on alcoholic liver injury in mice**

Mengqi Wang<sup>a</sup>, Xiaoyan Feng<sup>a</sup>, Yu Zhao<sup>a</sup>, Yuzhi Lan<sup>a</sup>, Hengyi Xu<sup>a,b\*</sup>

<sup>a</sup> State Key Laboratory of Food Science and Resources, Nanchang University, Nanchang 330047, P.R. China.

<sup>b</sup> International Institute of Food Innovation, Nanchang University, Nanchang 330299, P.R. China

\*Correspondence to:

Dr. Hengyi Xu

State Key Laboratory of Food Science and Resources, Nanchang University.

Address: 235 Nanjing East Road, Nanchang 330047, P. R. China.

Phone: +0086-791-8830-4447-ext-9520.

Fax: +0086-791-8830-4400.

E-mail: kidyxu@163.com; HengyiXu@ncu.edu.cn

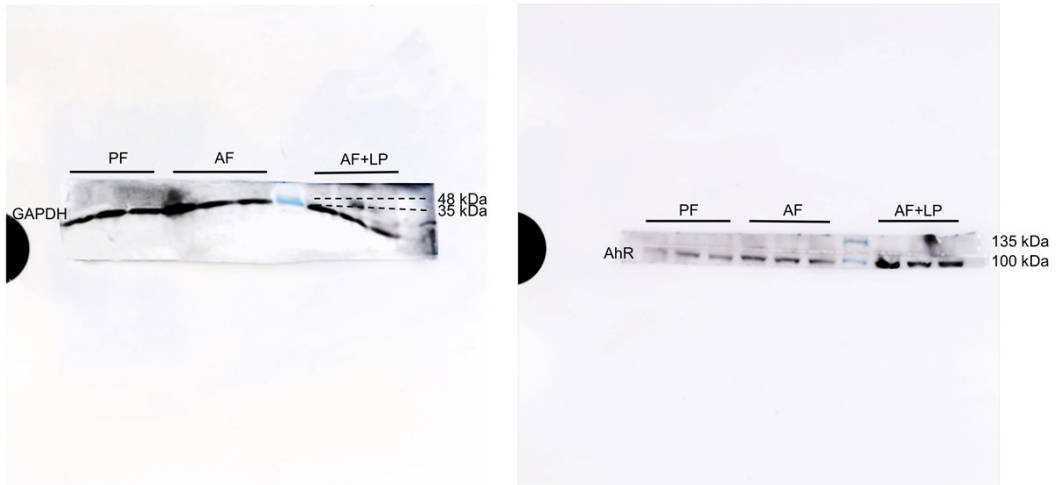

Figure S1. Immunoblot images of AhR expression level of mice liver altered by *Lactiplantibacillus plantarum* P101.

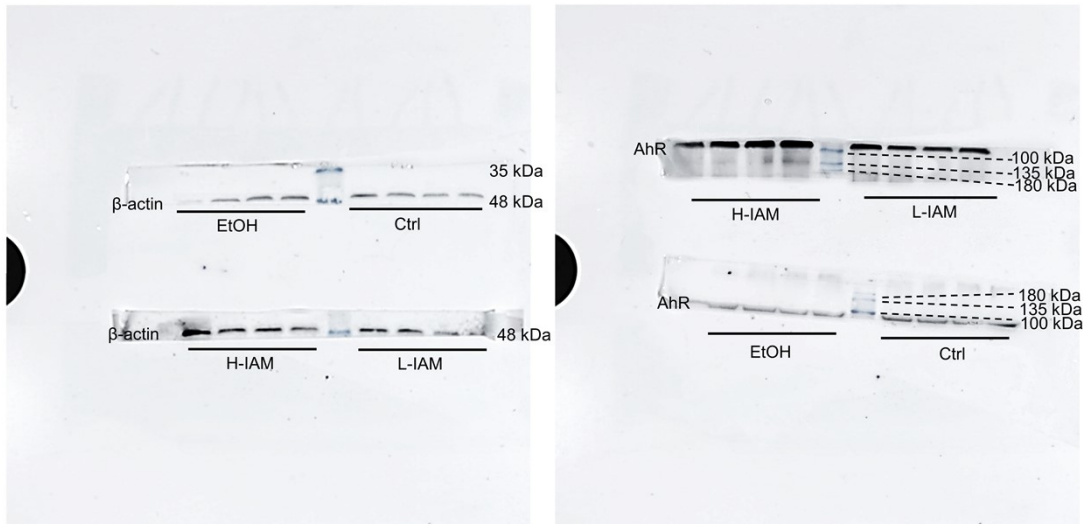

Figure S2. Immunoblot images of AhR expression level of HepG2 cells regulated by indole-3-acetamide.
