# Supplementary material for: Indole-3-acetamide from gut microbiota activated hepatic AhR and mediated the remission effect of Lactiplantibacillus plantarum P101 on alcoholic liver injury in mice
Source: Royal Society of Chemistry journal article supplement (doi:10.1039/d3fo03585a), 2023-01-01
Supplement: d3fo03585a2.xlsx [file d3fo03585a2.xlsx]

## Sheet: Figure 1
	PF	4.59666	4.36761	4.41379	4.28067	4.23303	4.57275
Liver index	AF	4.8855	5.41872	4.85333	5.43912	5.2	5.06623
	AF+LP	5.03084	5.14259	5.19048	4.84344	5.09804	4.71281
	PF	18.4502	17.4159	19.2456	17.2542	18.0914
ALT	AF	64.3544	72.6196	77.3178	71.4306	67.7527
	AF+LP	57.9124	50.786	62.209	68.5678	56.9691
	PF	18.4633	19.5603	24.676	21.1518	26.7879
AST	AF	82.1327	79.7405	86.7571	81.2558	83.3817
	AF+LP	75.6053	70.2873	67.5862	77.9701	71.1596

## Sheet: Figure2
	PF	0.600176	0.621771	0.766337	0.59243	1.08496
MDA	AF	1.03865	0.935033	0.890292	1.19492	1.23183
	AF+LP	0.591352	0.559009	0.929178	0.730403	0.980783
	PF	153.245	161.045	145.004	145.57	160.385
SOD	AF	129.062	136.27	137.163	139.636	145.027
	AF+LP	163.422	164.099	167.13	177.04	177.611
	PF	56.6959	58.935	56.0392	65.2704	53.5705
CAT	AF	34.0961	24.6464	35.9519	47.1134	52.5757
	AF+LP	57.332	63.8387	51.7764	65.1472	47.9394
	PF	2.95938	3.06868	2.94707	3.50196	2.62487
GSH	AF	2.74305	2.66153	2.7925	2.71795	3.16434
	AF+LP	2.89112	3.50685	3.36867	2.52954	4.1948
	PF	34.7694	28.7013	39.1429	39.4047	36.9205
TNF-α	AF	31.8457	26.2816	35.4029	31.2192	29.7996
	AF+LP	27.4058	18.9066	22.8038	29.5412	22.2703
	PF	2.90735	2.6329	2.90496	2.35368	2.63051
IL-1β	AF	2.69335	2.33537	2.77999	3.5689	3.01407
	AF+LP	2.89294	2.7831	2.14992	2.50097	2.69049
	PF	9.08423	8.97534	8.28277	11.8641	13.0659
IL-6	AF	12.157	14.0371	11.9216	12.0098	11.912
	AF+LP	11.9032	11.7833	12.7569	11.371	13.0484
	PF	63.6806	49.0651	72.365	54.8184	64.2564
IL-10	AF	35.5963	34.2888	33.9515	31.0161	36.6609
	AF+LP	42.2095	44.6716	40.227	47.5215	43.6574
	PF			AF			AF+LP
ADH1	0.923382	1.08298	1.03459	0.809442	0.787308	0.891929	1.67211	1.31191	1.29385
ALDH1	0.981686	1.00231	1.01631	1.29534	1.16743	1.26138	2.28153	2.2974	2.31338
ALDH2	1.00231	0.988514	1.00928	1.06683	1.00231	1.11214	1.3566	1.7411	1.45397
CYP2E1	0.948246	0.961483	1.09682	1.65099	1.37872	1.5728	1.82766	1.6358	1.56917
TLR4	0.972655	0.959264	1.07177	2.02792	2.58471	2.36198	1.11214	1.08925	1.16743
NF-κB	1.00674	0.955945	1.04608	5.37029	4.90754	5.19894	1.31798	1.50351	1.20442
IL-6	0.861546	1.01558	1.1607	23.1429	21.3671	19.5962	1.07985	1.15869	0.981119
IL-22	1.00433	0.888843	1.12506	1.99654	1.29909	1.68958	1.38562	1.49226	1.0924
TNFα	1.06683	1.03049	0.909618	2.75267	3.18398	2.65891	0.753058	0.603252	0.698568

## Sheet: Figure3 
	PF	6.1795	6.1055	5.4313	6.3883
Shannon	AF	5.4495	5.5407	3.2823	5.2148
	AF+LP	5.96	6.0546	6.0217	5.773
	PF	0.9734	0.9688	0.9491	0.9697
Simpson	AF	0.9596	0.9608	0.7764	0.8842
	AF+LP	0.9752	0.9687	0.957	0.9532
	PF	140	200	164	227
Chao	AF	138	145.4	127	72
	AF+LP	160	164	211	206
	PF	10.0537	7.33552	6.60688	4.58326
Bacteroides	AF	12.9542	13.6875	23.8011	31.9356
	AF+LP	5.5631	10.2208	9.88919	15.7245
	PF	2.03015	6.00482	3.47826	3.51674
Coprostanoligenes	AF	0.020739	1.19775	0.165711	0.043393
	AF+LP	7.22645	4.9618	16.248	13.9085
	PF	4.341	3.4554	6.96681	9.86614
Parabacteroides	AF	0.45773	0.386077	4.37974	2.06197
	AF+LP	3.15624	3.01753	6.09194	5.37001
	PF	0.866787	0.171488	1.14913	0.940595
Blautia	AF	1.50207	0.889868	0.118929	0.727696
	AF+LP	2.05583	2.07028	5.94036	4.02945
	PF	0.097094	0	0.655935	0.123489
Oscillibacter	AF	0	0	0	0
	AF+LP	0.141599	0.580828	1.25378	0.83299
	PF	0	0	0	0
Lactiplantibacillus	AF	0	0	0	0.042206
	AF+LP	0.042734	0.026041	0.064536	0.166598

## Sheet: Figure4
	PF	0	0	0	0	0.406236
Dihydrosterigmatocystin	AF	79.0529	44.0739	44.0202	40.0828	60.463
	AF+LP	5.31703	13.325	15.6877	6.76687	6.40209
	PF	10.7089	11.185	4.62388	0	6.0846
Pretyrosine	AF	69.073	27.8722	31.5676	41.6047	43.1842
	AF+LP	0	17.8072	1.21199	7.28499	4.89426
	PF	2.84682	33.8461	11.2285	42.1428	8.54514
Indole-3-acetamide	AF	3.32721	0	0	0	0.322613
	AF+LP	112.871	35.9571	109.635	44.7382	53.7321
	PF	36.6188	31.1592	28.69	26.0807	20.0671
Abscisic acid glucose ester	AF	6.5263	12.1126	13.4667	2.61608	15.4298
	AF+LP	90.1601	37.96	39.907	94.7194	47.0692

## Sheet: Figure5
	PF	1.00394	1.07453	0.968643	0.829159	1.12372
Trp	AF	1.34757	1.13388	1.00732	1.29253	1.65319
	AF+LP	0.959336	1.34718	1.35157	1.37234	1.52527
	PF	0.684474	1.44069	1.16339	0.984408	0.72704
Kyn	AF	2.66598	1.66672	4.12628	2.87642	6.03015
	AF+LP	1.41118	1.7865	1.59547	1.16195	1.89328
	PF	0.673992	1.32543	1.18732	1.17366	0.639595
Kyn/Trp	AF	1.95575	1.45312	4.04945	2.21354	3.60588
	AF+LP	1.45418	1.31094	1.16696	0.837012	1.22709
	PF	0.899553	1.07108	1.00774	0.993034	1.0286
Indole	AF	1.27154	1.03776	0.872743	0.86443	1.29577
	AF+LP	1.24303	1.21871	1.38719	1.33801	1.38458
	0					50					100					200					400					600
0	107.477	102.587	97.9746	98.2174	93.7435	101.2	112.784	108.102	95.9978	107.685	101.061	119.512	110.321	114.309	105.327	110.148	110.807	113.685	123.049	109.489	140.078	137.997	150.205	131.407		117.986	130.194	134.182	133.558	124.436
400		92.6379		88.9644	87.9898	104.933	94.1373	99.1603		91.6633	102.234	106.807	102.159	105.533	106.207	105.608	104.858	107.632		104.783	112.13	106.657	120.452		109.506	132.822	125.7	133.272	135.221
600			39.5271	34.4847	26.4222			39.444	28.7495	23.1529			38.7791	31.5755	25.314	55.3195	52.0225	47.8389				63.4097	51.1359	40.9956		73.8548		61.3594	57.2867
800	27.6967	27.7798	27.0318	26.5608	34.6509	19.2187	19.6897	18.9139	21.4906	31.5755	29.2482	36.812	29.6638		25.0923	26.3391	38.0587	38.3912	21.9616	24.843	26.8932	25.9789	21.0196	21.3798	30.024	33.2379	30.7721	30.6335	30.6889	36.3687
	Ctrl			EtOH			L-IAM			H-IAM
AHR	1.04247	0.946058	1.01396	0.771997	0.622725	0.644685	0.83702	0.831238	0.808508	2.37292	2.32409	2.50822
CYP1A1	1.04972	0.952638	1.00087	0.509328	0.545884	0.523647	1.08173	0.974905	1.11214	2.18354	2.1386	2.38943
CYP1A2	0.99539	1.05946	0.948246	0.672062	0.627056	0.640232	0.517632	0.598739	0.707107	1.45397	1.47427	1.55833

## Sheet: Figure6
	Ctrl	5.20233	5.5682	3.95738			Ctrl	51.269	48.102	53.061
ALT	EtOH	10.4668	10.7691	11.0747		SOD	EtOH	39.99	44.442	41.584
	L-IAM	6.60458	7.36704	6.97603			L-IAM	48.009	51.198	49.612
	H-IAM	6.57503	6.02567	7.10709			H-IAM	49.557	40.347	41.238
	Ctrl	10.7406	11.5394	11.984			Ctrl	12.868	11.09	12.782
AST	EtOH	15.058	15.6022	16.165		CAT	EtOH	9.5262	10.861	6.0211
	L-IAM	14.1236	14.0039	13.9008			L-IAM	10.32	9.984	10.659
	H-IAM	13.9978	12.9808	13.3749			H-IAM	12.274	11.427	13.104
	Ctrl	0.253751	0.165706	0.253174			Ctrl	8.83952	10.2927	8.99293
TC	EtOH	0.805679	0.892345	0.848103		GSH	EtOH	1.97462	2.18227	1.9273
	L-IAM	0.293314	0.254438	0.492182			L-IAM	2.08659	2.33249	2.53469
	H-IAM	0.194581	0.598044	0.444242			H-IAM	4.95293	4.28481	4.26042
	Ctrl	0.14821	0.234045	0.323529			Ctrl	8.4197	8.6323	11.497
TG	EtOH	0.728525	0.811942	0.911727		TNF-α	EtOH	19.071	17.691	16.29
	L-IAM	0.414278	0.304082	0.368024			L-IAM	16.591	15.746	16.177
	H-IAM	0.761752	0.643023	0.507935			H-IAM	9.585	10.264	10.926
	Ctrl			EtOH			L-IAM			H-IAM
ADH1	0.936272	1.06807	1.00344	3.31345	2.02558	2.84481	7.2369	7.11896	7.3191	9.86054	9.17351	8.46592
ALDH1	0.97942	1.04972	0.972655	1.76949	1.85746	1.84463	1.21982	1.19471	1.36289	6.80534	6.75833	6.79873
ALDH2	1.18646	1.06191	0.793701	1.8025	2.15846	2.58471	1.52979	2.13366	1.47768	4.63746	5.19895	5.43897
CYP2E1	0.926588	1.02101	1.05702	6.66528	6.19875	5.52765	1.26283	1.42076	0.874583	1.96337	2.31873	1.62826
TLR4	0.815072	1.00141	1.22689	1.72944	1.71912	1.74311	1.44226	1.90308	1.68102	1.04126	1.5351	0.711203
NF-κB	1.7304	0.962594	1.03886	1.03964	1.05842	1.14208	1.04851	1.03407	1.02693	0.778265	0.756983	0.623445
TNFα	0.986233	0.913831	1.10957	1.54399	1.70395	1.19471	1.47427	1.37428	1.25701	1.21229	1.21982	1.18646
IL-6	1.09429	0.913831	1.00784	2.86129	1.09936	0.997692	1.67404	0.703847	1.19727	1.66248	0.643197	1.15197
IL-10	0.671286	1.48968	1.08039	0.551589	0.836053	0.709189	1.08548	0.946209	0.789129	0.746562	0.71615	0.720047
IL-1β	0.898132	1.11342	1.09758	2.08734	1.78326	1.67211	1.51098	1.45902	1.7593	1.36762	1.27603	0.688566
