# Supplementary material for: Indole-3-acetamide from gut microbiota activated hepatic AhR and mediated the remission effect of Lactiplantibacillus plantarum P101 on alcoholic liver injury in mice
Source: Royal Society of Chemistry journal article supplement (doi:10.1039/d3fo03585a), 2023-01-01
Supplement: d3fo03585a3.pdf [file d3fo03585a3.pdf]

**Indole-3-acetamide from gut microbiota activated hepatic AhR and mediated the remission effect of *Lactiplantibacillus plantarum* P101 on alcoholic liver injury in mice**

Mengqi Wang<sup>a</sup>, Xiaoyan Feng<sup>a</sup>, Yu Zhao<sup>a</sup>, Yuzhi Lan<sup>a</sup>, Hengyi Xu<sup>a,b\*</sup>

<sup>a</sup> State Key Laboratory of Food Science and Resources, Nanchang University, Nanchang 330047, P.R. China.

<sup>b</sup> International Institute of Food Innovation, Nanchang University, Nanchang 330299, P.R. China

\*Correspondence to:

Dr. Hengyi Xu

State Key Laboratory of Food Science and Resources, Nanchang University.

Address: 235 Nanjing East Road, Nanchang 330047, P. R. China.

Phone: +0086-791-8830-4447-ext-9520.

Fax: +0086-791-8830-4400.

E-mail: kidyxu@163.com; HengyiXu@ncu.edu.cn

Table S1. Reagents and assay kits used in this study.

| Reagents/assay kits                                                                 | Manufacturer                               | Location        | Catalog number/CAS                     |
|-------------------------------------------------------------------------------------|--------------------------------------------|-----------------|----------------------------------------|
| Man Rogosa Sharpe (MRS) broth                                                       | Solarbio Science & Technology Co., Ltd.    | Beijing, China  | M8540                                  |
| Lieber-DeCarli liquid diets; maltodextrin                                           | TROPIC Animal Feed High-Tech Co., Ltd.     | Jiangsu, China  | TP-4030                                |
| Ethanol (95% AR)                                                                    | Sinopharm Chemical Reagent Co., Ltd.       | Shanghai, China | 64-17-5                                |
| Neutral paraformaldehyde fixative                                                   | Wuhan Servicebio Technology Co., Ltd.      | Hubei, China    | G1101                                  |
| RNA wait                                                                            | Solarbio Science & Technology Co., Ltd.    | Beijing, China  | SR0020                                 |
| Mouse TNF- $\alpha$ , IL-1 $\beta$ , IL-6, IL-10 and human TNF- $\alpha$ ELISA kits | YSRIBIO Industrial Co., Ltd.               | Shanghai, China | /                                      |
| SOD, CAT, GSH and MDA assay kits                                                    | Nanjing Jiancheng Bioengineering Institute | Jiangsu, China  | A001-3-2, A007-1-1, A006-2-1, A003-1-2 |
| AST, ALT, TC and TG assay kits                                                      | Nanjing Jiancheng Bioengineering Institute | Jiangsu, China  | C010-2-1, C009-2-1, A111-1-1, A110-1-1 |
| BCA assay kit                                                                       | Applygen Technologies Inc.                 | Beijing, China  | P1513                                  |
| RNA FastPure Kit                                                                    | Tsingke Biotechnology Co., Ltd.            | Beijing, China  | TSP413                                 |
| cDNA Synthesis kit, SYBR Green Mix                                                  | Yeasen Biotechnology Co.,                  | Shanghai, China | 11119ES60                              |

---

|                                                                   |                                                   |                    |                                       |
|-------------------------------------------------------------------|---------------------------------------------------|--------------------|---------------------------------------|
|                                                                   | Ltd.                                              |                    |                                       |
| Primers                                                           | Generalbiol Co., Ltd.                             | Anhui, China       | /                                     |
| RIPA Lysis Buffer                                                 | Applygen Technologies Inc.                        | Beijing, China     | C1053                                 |
| PMSF, AP                                                          | Merck KGaA                                        | Darmstadt, Germany | 329-98-6, 7727-54-0                   |
| Sodium dodecyl sulfate                                            | Shanghai Aladdin Biochemical Technology Co., Ltd. | Shanghai, China    | 151-21-3                              |
| Tris                                                              | Sinopharm Chemical Reagent Co., Ltd.              | Shanghai, China    | 77-86-1                               |
| Glycine, 1,2-Bis(dimethylamino)ethane, ColorMixed Protein Marker  | Solarbio Science & Technology Co., Ltd.           | Beijing, China     | 56-40-6, 110-18-9, PR1910             |
| Tween-20                                                          | Sangon Biotech (Shanghai) Co., Ltd.               | Shanghai, China    | A600560                               |
| ECL chemiluminescence kit                                         | Nanjing Vazyme Biotech Co.,Ltd.                   | Jiangsu, China     | E411-04/05                            |
| BSA                                                               | BioFROXX GmbH                                     | Einhausen, Germany | 143064                                |
| PVDF Membrane                                                     | Merck KGaA                                        | Darmstadt, Germany | IPVH00010                             |
| DMSO, Trypsin, 1×PBS, Penicillin-Streptomycin Liquid, DMEM medium | Solarbio Science & Technology Co., Ltd.           | Beijing, China     | YT0145, YT0145, YM3028, RS0011, 11965 |
| Fetal bovine serum                                                | Cellmax Co., Ltd.                                 | Beijing, China     | SA201                                 |
| Indole-3-acetamide                                                | Sigma-Aldrich Trading Co., Ltd.                   | Shanghai, China    | 67-68-5, 9002-07-7, P1020, P1400      |

---

---

|                                     |                                             |                    |            |
|-------------------------------------|---------------------------------------------|--------------------|------------|
| Trypan blue Stain                   | Shanghai yuanye Bio-<br>Technology Co., Ltd | Shanghai,<br>China | R20306     |
| CCK-8 Cell Counting<br>Kit          | Nanjing Vazyme<br>Biotech Co., Ltd.         | Jiangsu, China     | A311-01/02 |
| ROS fluorescence<br>probe assay kit | Solarbio Science &<br>Technology Co., Ltd.  | Beijing, China     | 4091-99-0  |

---

Table S2. Primers used in this study.

| Gene                       | Forward                       | Reverse                     |
|----------------------------|-------------------------------|-----------------------------|
| <b><i>Mus musculus</i></b> |                               |                             |
| <i>β-actin</i>             | GCTCCTCCTGAGCGCAAGT<br>A      | CAGCTCAGTAACAGTCCGCC        |
| <i>ADH1</i>                | GCAAAGCTGCGGTGCTATG           | TCACACAAGTCACCCCTTCT<br>C   |
| <i>ALDH1</i>               | ATACTTGTCGGATTTAGGAG<br>GCT   | GGCCTATCTTCCAAATGAA<br>CA   |
| <i>ALDH2</i>               | TTCCCACCGTCAACCCTTC           | CCAATCGGTACAACAGCCG         |
| <i>CYP2E1</i>              | CGTTGCCTTGCTTGTCTGGA          | AAGAAAGGAATTGGGAAAG<br>GTCC |
| <i>TLR-4</i>               | CTGTATTCCCTCAGCACTCT<br>TGATT | TGCTTCTGTTCCCTTGACCCAC<br>T |
| <i>NF-κB</i>               | ACACTGGAAGCACGGATGA<br>C      | TGTCTGTGAGTTGCCGGTCT        |
| <i>TNF-α</i>               | CTCATGCACCACCATCAAG<br>G      | ACCTGACCACTCTCCCTTTG        |
| <i>IL-6</i>                | TTCCATCCAGTTGCCTTCTT          | CAGAATTGCCATTGCACAAC        |
| <i>IL-22</i>               | TGAGTTTTTCCCTTATGGGG<br>AC    | CTGGAAGTTGGACACCTCAA        |
| <i>AHR</i>                 | TGCCTTGGTCTTCTATGCTT          | GCTCATATACGCTCTGATGG<br>AT  |
| <i>AHRR</i>                | ACATACGCCGGTAGGAAGA<br>GA     | GGTCCAGCTCTGTATTGAGG<br>C   |
| <i>CYP1A2</i>              | ATCCTGGAGATCTACCGAT<br>ACA    | TATGTAGATACAGCGCTCCT<br>TG  |
| <b><i>Homo sapiens</i></b> |                               |                             |
| <i>ADH1</i>                | AGTCATCCCCTCGCTATTC<br>C      | GTCCCCTGAGGATTGCTTAC<br>A   |
| <i>CYP2E1</i>              | ATGTCTGCCCTCGGAGTCA           | CGATGATGGGAAGCGGGAA<br>A    |
| <i>ALDH1</i>               | CTGCTGGCGACAATGGAGT           | CGCAATGTTTTGATGCAGCC<br>T   |
| <i>ALDH2</i>               | ATGGCAAGCCCTATGTCATC<br>T     | CCGTGGTACTTATCAGCCCA        |
| <i>TLR4</i>                | TGAGCAGTCGTGCTGGTATC          | CAGGGCTTTTCTGAGTCGTC        |
| <i>NF-κB</i>               | AGCAAATAGACGAGCTCCG<br>A      | TCGGTAAAGCTGAGTTTGCG        |
| <i>IL-10</i>               | TCAAGGCGCATGTGAACTC<br>C      | GATGTCAAACCTCACTCATGG<br>CT |
| <i>IL-6</i>                | TGTGTGGGGCGGCTACATCT          | GCCTTCGGTCCAGTTGCCTT        |
| <i>TNF-α</i>               | CCCTCACACTCAGATCATCT<br>TCT   | GCTACGACGTGGGCTACAG         |

*IL-1 $\beta$*

ATGATGGCTTATTACAGTGG  
CAA

GTCGGAGATTCGTAGCTGGA

---
